# Supplementary material for: Hexane Fraction of Adenophora triphylla var. japonica Root Extract Inhibits Angiogenesis and Endothelial Cell-Induced Erlotinib Resistance in Lung Cancer Cells
Source: MDPI journal article supplement (doi:10.3390/molecules29030597), 2024-01-25
Supplement: s1 [file s1]

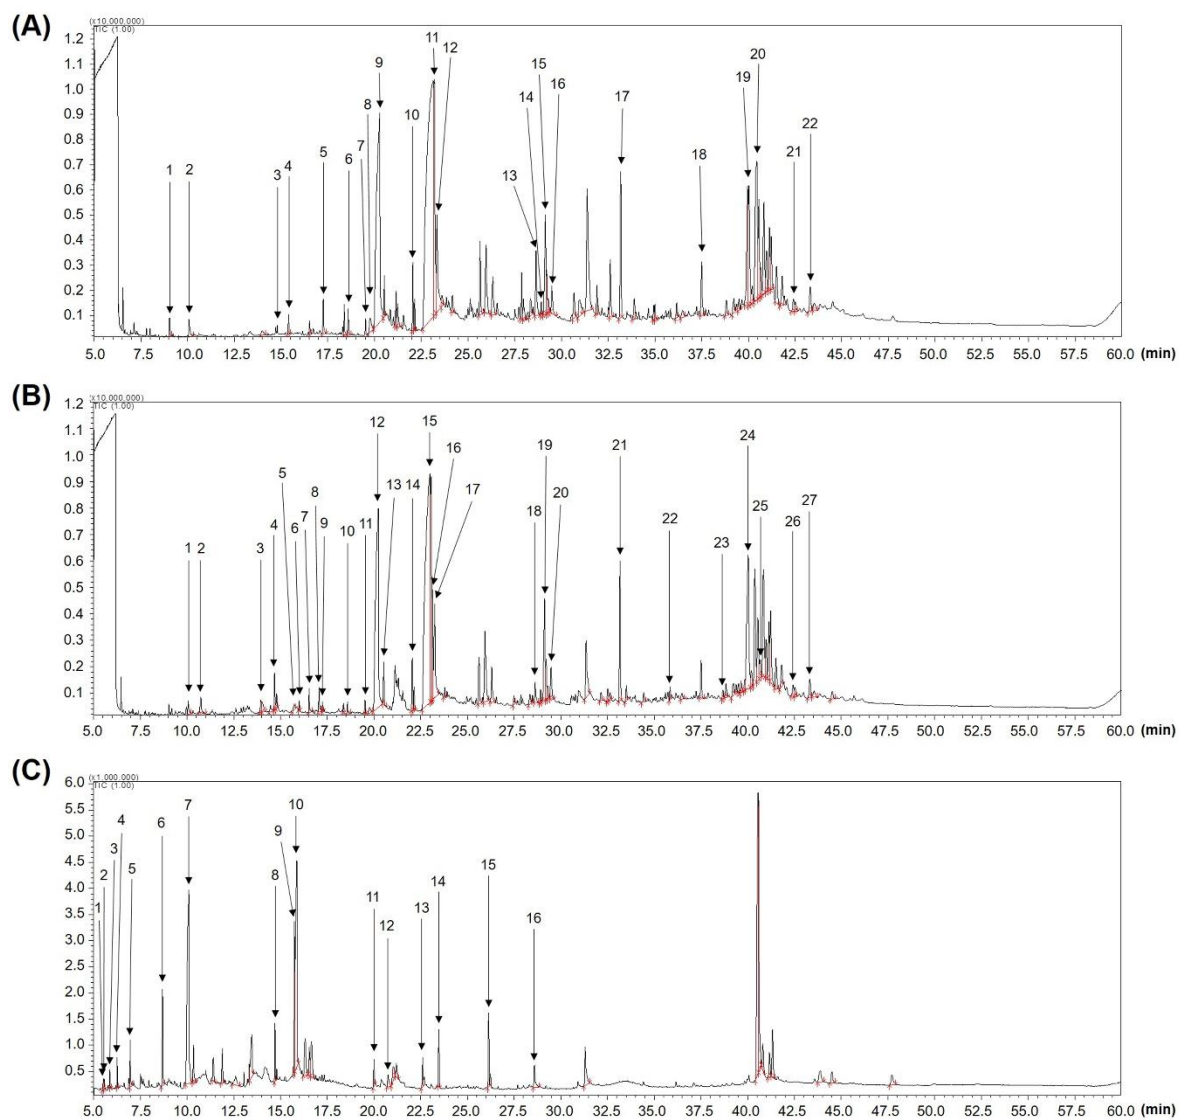

**Supplementary Figure S1. Identification of the constituents in AT root fractions by GC/MS analysis.** The total gas chromatograms of HAT (A), EAT (B), and BAT (C) are shown. BAT, butanol fraction of *Adenophora triphylla* var. *japonica* root extract; EAT, ethyl acetate fraction of *Adenophora triphylla* var. *japonica* root extract; HAT, hexane fraction of *Adenophora triphylla* var. *japonica* root extract.

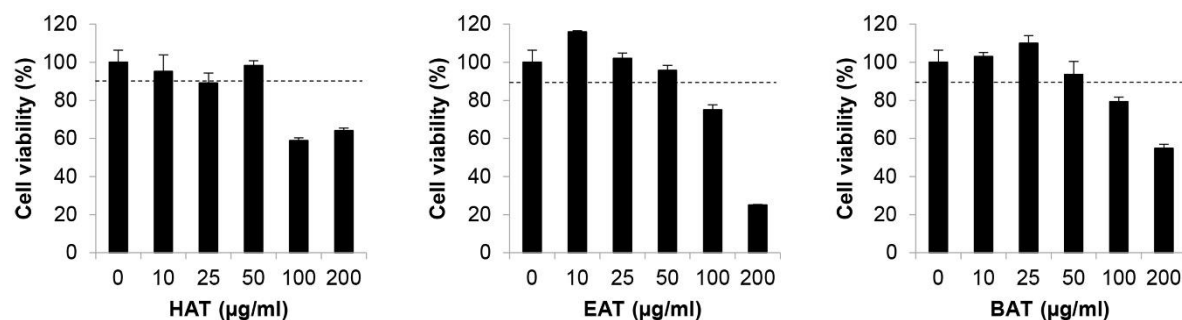

**Supplementary Figure S2. Effects of AT root fractions on HUVEC viability.** HUVECs were exposed to different concentrations (10-200 µg/ml) of HAT (left panel), EAT (middle panel), and BAT (right panel) for 24 h. Cell viability was measured by MTT assay. The dotted line indicates a threshold of 90% cell viability. BAT, butanol fraction of *Adenophora triphylla* var. *japonica* root extract; EAT, ethyl acetate fraction of *Adenophora triphylla* var. *japonica* root extract; HAT, hexane fraction of *Adenophora triphylla* var. *japonica* root extract; HUVEC, human umbilical vein endothelial cell.

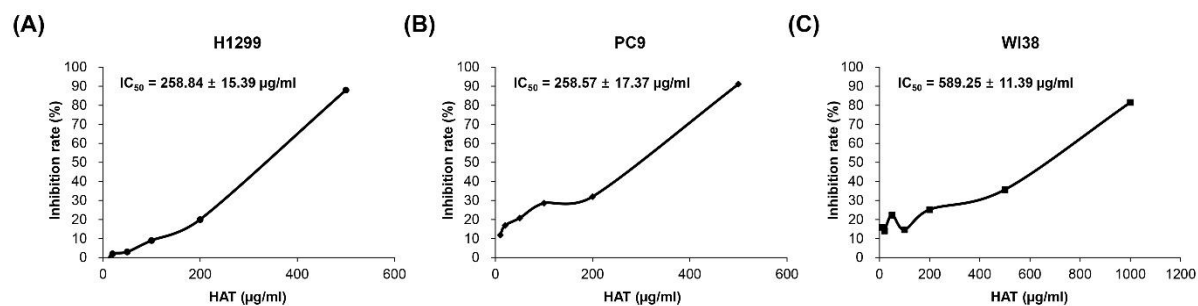

**Supplementary Figure S3. The  $\text{IC}_{50}$  values for HAT on cancer cells and normal cells.** H1299 (A) and PC9 (B) human lung carcinoma cells and WI38 human lung fibroblasts (C) were exposed to different concentrations of HAT for 24 h. The growth inhibition rate was determined by assessing cell viability using the MTT assay. The  $\text{IC}_{50}$  values for HAT were calculated based on the inhibition rate. HAT, hexane fraction of *Adenophora triphylla* var. *japonica* root extract.

**Supplementary Table S1. Characterization of chemical constituents in HAT, EAT, and BAT by GC/MS analysis.**

| Fraction | No. | RT <sup>1</sup><br>(min) | Formula                                        | MW <sup>2</sup><br>(m/z) | SI <sup>3</sup> | Area<br>(%) | Identification                                            |
|----------|-----|--------------------------|------------------------------------------------|--------------------------|-----------------|-------------|-----------------------------------------------------------|
| HAT      | 1   | 9.037                    | C <sub>6</sub> H <sub>8</sub> O <sub>4</sub>   | 144                      | 95              | 0.20        | 4H-Pyran-4-one, 2,3-dihydro-3,5-dihydroxy-6-methyl-       |
|          | 2   | 10.073                   | C <sub>6</sub> H <sub>6</sub> O <sub>3</sub>   | 126                      | 96              | 0.36        | 5-Hydroxymethyl-2-furaldehyde                             |
|          | 3   | 13.994                   | C <sub>6</sub> H <sub>12</sub> O <sub>6</sub>  | 180                      | 95              | 0.16        | D-Allose                                                  |
|          | 4   | 15.400                   | C <sub>12</sub> H <sub>16</sub> O <sub>3</sub> | 208                      | 94              | 0.17        | Asarone                                                   |
|          | 5   | 17.258                   | C <sub>14</sub> H <sub>28</sub> O <sub>2</sub> | 228                      | 95              | 0.44        | Tetradecanoic acid                                        |
|          | 6   | 18.594                   | C <sub>15</sub> H <sub>30</sub> O <sub>2</sub> | 242                      | 96              | 0.35        | Pentadecanoic acid                                        |
|          | 7   | 19.769                   | C <sub>16</sub> H <sub>30</sub> O <sub>2</sub> | 254                      | 92              | 0.53        | 6-Pentadecenoic acid, 13-methyl-, (6Z)-                   |
|          | 8   | 20.279                   | C <sub>16</sub> H <sub>32</sub> O <sub>2</sub> | 256                      | 94              | 12.51       | Palmitic acid                                             |
|          | 9   | 20.526                   | C <sub>18</sub> H <sub>36</sub> O <sub>2</sub> | 284                      | 96              | 0.5         | Hexadecanoic acid, ethyl ester                            |
|          | 10  | 22.051                   | C <sub>19</sub> H <sub>34</sub> O <sub>2</sub> | 294                      | 96              | 0.83        | 9,12-Octadecadienoic acid (Z,Z)-, methyl ester            |
|          | 11  | 23.139                   | C <sub>18</sub> H <sub>32</sub> O <sub>2</sub> | 280                      | 93              | 27.33       | 9,12-Octadecadienoic acid (Z,Z)-                          |
|          | 12  | 23.348                   | C <sub>18</sub> H <sub>36</sub> O <sub>2</sub> | 284                      | 92              | 2.29        | Octadecanoic acid                                         |
|          | 13  | 28.644                   | C <sub>19</sub> H <sub>38</sub> O <sub>4</sub> | 330                      | 94              | 1.27        | Hexadecanoic acid, 2-hydroxy-1-(hydroxymethyl)ethyl ester |
|          | 14  | 28.926                   | C <sub>24</sub> H <sub>38</sub> O <sub>4</sub> | 390                      | 95              | 0.21        | Diisooctylphthalate                                       |
|          | 15  | 29.146                   | C <sub>22</sub> H <sub>42</sub> O <sub>2</sub> | 338                      | 93              | 2.22        | Erucic acid                                               |
|          | 16  | 29.485                   | C <sub>22</sub> H <sub>44</sub> O <sub>2</sub> | 340                      | 93              | 0.63        | Docosanoic acid                                           |
|          | 17  | 33.176                   | C <sub>30</sub> H <sub>50</sub>                | 410                      | 93              | 2.65        | Squalene                                                  |
|          | 18  | 37.502                   | C <sub>29</sub> H <sub>50</sub> O <sub>2</sub> | 430                      | 94              | 1.06        | DL-alpha-Tocopherol                                       |

|     |    |        |                                                |     |    |       |                                                 |
|-----|----|--------|------------------------------------------------|-----|----|-------|-------------------------------------------------|
|     | 19 | 39.960 | C <sub>30</sub> H <sub>48</sub> O              | 424 | 90 | 2.96  | Taraxerone                                      |
|     | 20 | 40.034 | C <sub>29</sub> H <sub>48</sub> O              | 412 | 94 | 2.82  | Chondrillasterol                                |
|     | 21 | 42.416 | C <sub>32</sub> H <sub>52</sub> O <sub>2</sub> | 468 | 91 | 0.27  | Lanosta-8,24-dien-3-ol, acetate, (3.β.)-        |
|     | 22 | 43.315 | C <sub>30</sub> H <sub>50</sub> O              | 426 | 92 | 0.60  | Friedelan-3-one                                 |
| EAT | 1  | 10.062 | C <sub>6</sub> H <sub>6</sub> O <sub>3</sub>   | 126 | 96 | 0.28  | 5-Hydroxymethylfurfural                         |
|     | 2  | 10.740 | C <sub>4</sub> H <sub>6</sub> O <sub>5</sub>   | 134 | 91 | 0.43  | Malic Acid                                      |
|     | 3  | 14.012 | C <sub>6</sub> H <sub>10</sub> O <sub>5</sub>  | 162 | 93 | 0.39  | β.-D-Glucopyranose, 1,6-anhydro-                |
|     | 4  | 14.683 | C <sub>10</sub> H <sub>12</sub> O <sub>2</sub> | 164 | 97 | 0.62  | 2-Butanone, 4-(4-hydroxyphenyl)-                |
|     | 5  | 15.737 | C <sub>9</sub> H <sub>16</sub> O <sub>4</sub>  | 188 | 93 | 0.21  | Azelaic acid                                    |
|     | 6  | 16.005 | C <sub>9</sub> H <sub>10</sub> O <sub>4</sub>  | 182 | 95 | 0.12  | Benzaldehyde, 4-hydroxy-3,5-dimethoxy-          |
|     | 7  | 16.531 | C <sub>11</sub> H <sub>14</sub> O <sub>3</sub> | 194 | 93 | 0.40  | (E)-2,6-Dimethoxy-4-(prop-1-en-1-yl)phenol      |
|     | 8  | 17.062 | C <sub>10</sub> H <sub>12</sub> O <sub>3</sub> | 180 | 91 | 0.49  | (E)-4-(3-Hydroxyprop-1-en-1-yl)-2-methoxyphenol |
|     | 9  | 17.242 | C <sub>14</sub> H <sub>28</sub> O <sub>2</sub> | 228 | 94 | 0.12  | Tetradecanoic acid                              |
|     | 10 | 18.585 | C <sub>15</sub> H <sub>30</sub> O <sub>2</sub> | 242 | 96 | 0.22  | Pentadecanoic acid                              |
|     | 11 | 19.524 | C <sub>17</sub> H <sub>34</sub> O <sub>2</sub> | 270 | 96 | 0.18  | Hexadecanoic acid, methyl ester                 |
|     | 12 | 20.233 | C <sub>16</sub> H <sub>32</sub> O <sub>2</sub> | 256 | 94 | 13.22 | Palmitic acid                                   |
|     | 13 | 20.524 | C <sub>18</sub> H <sub>36</sub> O <sub>2</sub> | 284 | 95 | 0.65  | Hexadecanoic acid, ethyl ester                  |
|     | 14 | 22.051 | C <sub>19</sub> H <sub>34</sub> O <sub>2</sub> | 294 | 95 | 0.80  | 9,12-Octadecadienoic acid (Z,Z)-, methyl ester  |
|     | 15 | 23.001 | C <sub>18</sub> H <sub>32</sub> O <sub>2</sub> | 280 | 94 | 24.74 | 9,12-Octadecadienoic acid (Z,Z)-                |
|     | 16 | 23.118 | C <sub>20</sub> H <sub>36</sub> O <sub>2</sub> | 308 | 91 | 1.96  | Linoleic acid ethyl ester                       |
|     | 17 | 23.258 | C <sub>18</sub> H <sub>36</sub> O <sub>2</sub> | 284 | 93 | 3.10  | Octadecanoic acid                               |

|     |    |        |                                                |     |    |       |                                                                                   |
|-----|----|--------|------------------------------------------------|-----|----|-------|-----------------------------------------------------------------------------------|
|     | 18 | 28.621 | C <sub>19</sub> H <sub>38</sub> O <sub>4</sub> | 330 | 94 | 0.55  | Hexadecanoic acid, 2-hydroxy-1-(hydroxymethyl)ethyl ester                         |
|     | 19 | 29.130 | C <sub>22</sub> H <sub>42</sub> O <sub>2</sub> | 338 | 93 | 2.98  | Erucic acid                                                                       |
|     | 20 | 29.476 | C <sub>22</sub> H <sub>44</sub> O <sub>2</sub> | 340 | 93 | 0.89  | Docosanoic acid                                                                   |
|     | 21 | 33.168 | C <sub>30</sub> H <sub>50</sub>                | 410 | 92 | 3.17  | Squalene                                                                          |
|     | 22 | 35.843 | C <sub>30</sub> H <sub>50</sub> O              | 426 | 92 | 0.24  | 1,6,10,14,18,22-Tetracosahexaen-3-ol,2,6,10,15,19,23-hexamethyl-,(all-E)-(.+/-.)- |
|     | 23 | 38.671 | C <sub>20</sub> H <sub>22</sub> O <sub>6</sub> | 358 | 93 | 0.19  | Pinoresinol                                                                       |
|     | 24 | 40.021 | C <sub>29</sub> H <sub>48</sub> O              | 412 | 92 | 6.18  | Chondrillasterol                                                                  |
|     | 25 | 40.645 | C <sub>30</sub> H <sub>50</sub> O              | 426 | 90 | 0.50  | beta.-Amyrin                                                                      |
|     | 26 | 42.422 | C <sub>32</sub> H <sub>52</sub> O <sub>2</sub> | 468 | 92 | 0.36  | Lanosta-8,24-dien-3-ol, acetate, (3.beta.)-                                       |
|     | 27 | 43.322 | C <sub>30</sub> H <sub>50</sub> O              | 426 | 93 | 0.56  | Friedelan-3-one                                                                   |
| BAT | 1  | 5.516  | C <sub>6</sub> H <sub>6</sub> O <sub>2</sub>   | 110 | 97 | 0.27  | 2-Furancarboxaldehyde, 5-methyl-                                                  |
|     | 2  | 5.559  | C <sub>7</sub> H <sub>6</sub> O                | 106 | 97 | 0.32  | Benzaldehyde                                                                      |
|     | 3  | 5.864  | C <sub>6</sub> H <sub>8</sub> O <sub>4</sub>   | 144 | 96 | 0.38  | 2,4-Dihydroxy-2,5-dimethyl-3(2H)-furan-3-one                                      |
|     | 4  | 6.260  | C <sub>7</sub> H <sub>14</sub> O <sub>3</sub>  | 146 | 96 | 0.56  | Butyl lactate                                                                     |
|     | 5  | 6.957  | C <sub>8</sub> H <sub>8</sub> O                | 120 | 91 | 1.27  | Benzeneacetaldehyde                                                               |
|     | 6  | 8.689  | C <sub>6</sub> H <sub>8</sub> O <sub>4</sub>   | 144 | 96 | 3.02  | 4H-Pyran-4-one, 2,3-dihydro-3,5-dihydroxy-6-methyl-                               |
|     | 7  | 10.098 | C <sub>6</sub> H <sub>6</sub> O <sub>3</sub>   | 126 | 95 | 16.12 | 5-Hydroxymethyl-2-furaldehyde                                                     |
|     | 8  | 14.706 | C <sub>12</sub> H <sub>22</sub> O <sub>4</sub> | 230 | 97 | 1.19  | Butanedioic acid, dibutyl ester                                                   |
|     | 9  | 15.745 | C <sub>12</sub> H <sub>22</sub> O <sub>5</sub> | 246 | 94 | 4.43  | ENT-337                                                                           |
|     | 10 | 15.874 | C <sub>9</sub> H <sub>15</sub> NO <sub>3</sub> | 185 | 96 | 13.79 | DL-Proline, 5-oxo-, butyl ester                                                   |

|    |        |                                                |     |    |      |                                                           |
|----|--------|------------------------------------------------|-----|----|------|-----------------------------------------------------------|
| 11 | 20.004 | C <sub>16</sub> H <sub>32</sub> O <sub>2</sub> | 256 | 95 | 0.73 | Palmitic acid                                             |
| 12 | 20.750 | C <sub>11</sub> H <sub>8</sub> N <sub>2</sub>  | 168 | 95 | 0.73 | 9H-Pyrido[3,4-b]indole                                    |
| 13 | 22.609 | C <sub>18</sub> H <sub>32</sub> O <sub>2</sub> | 280 | 96 | 1.03 | 9,12-Octadecadienoic acid (Z,Z)-                          |
| 14 | 23.471 | C <sub>20</sub> H <sub>40</sub> O <sub>2</sub> | 312 | 93 | 1.67 | Hexadecanoic acid, butyl ester                            |
| 15 | 26.136 | C <sub>22</sub> H <sub>40</sub> O <sub>2</sub> | 336 | 94 | 2.38 | Butyl 9,12-octadecadienoate                               |
| 16 | 28.585 | C <sub>19</sub> H <sub>38</sub> O <sub>4</sub> | 330 | 94 | 1.21 | Hexadecanoic acid, 2-hydroxy-1-(hydroxymethyl)ethyl ester |

---

<sup>1</sup>RT, retention time; <sup>2</sup>MW, molecular weight; <sup>3</sup>SI, Similarity index
